# Supplementary material for: A room-temperature nitrite-based hybrid bimetal molecular ferroelectric material: [(R)-3-quinuclidinol]2[LiCo(NO2)6]
Source: Royal Society of Chemistry journal article supplement (doi:10.1039/d3ce00536d), 2023-01-01
Supplement: d3ce00536d1.pdf [file d3ce00536d1.pdf]

## Supporting Information

A high-temperature hybrid bimetal nitrite perovskite  
ferroelectric: [(*R*)-3-quinuclidinol]<sub>2</sub>[LiCo(NO<sub>2</sub>)<sub>6</sub>]

*Zhi-Yuan Yue*<sup>†</sup>, *Rong-Meng Liao*<sup>†</sup>, *Wang Luo*, *Na Wang*, *Le-Ping Miao*<sup>\*</sup>,  
*Heng-Yun Ye* and *Chao Shi*<sup>\*</sup>

Chaotic Matter Science Research Center, Department of Materials,  
Metallurgy and Chemistry, Jiangxi University of Science and Technology,  
Ganzhou 341000, P. R. China.

Corresponding authors:

[\\*15150517670@163.com](mailto:*15150517670@163.com)

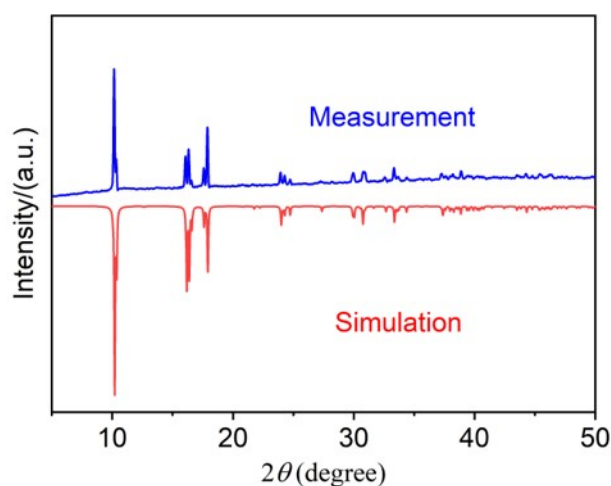

**Figure. S1** PXRD patterns of 1 297 K.

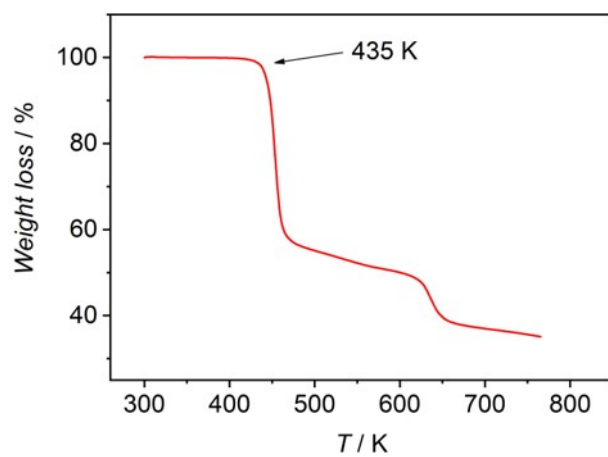

**Figure. S2** The thermogravimetric analysis of **1**.

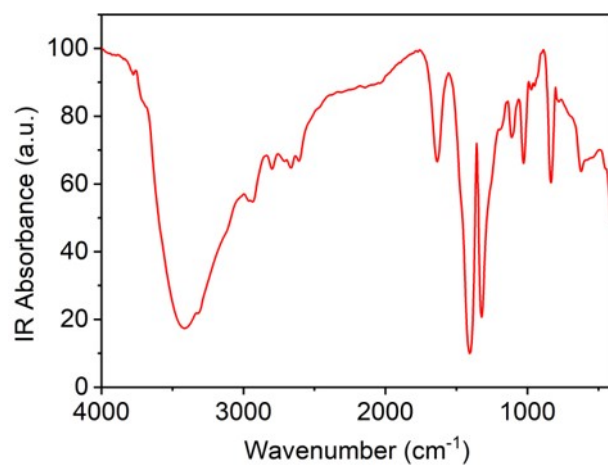

**Figure. S3** Infrared (IR) spectra for **1**.

**Table S1** Crystal Data and Structure Refinement Details for **1** at 297 K and 350 K.

|                                                                                   | <b>1</b> _297 K                                                    | <b>1</b> _350 K |
|-----------------------------------------------------------------------------------|--------------------------------------------------------------------|-----------------|
| Empirical formula                                                                 | C <sub>14</sub> H <sub>28</sub> CoLiN <sub>8</sub> O <sub>14</sub> |                 |
| Formula weight                                                                    | 596.30                                                             |                 |
| Crystal system                                                                    | monoclinic                                                         | trigonal        |
| Space group                                                                       | <i>C</i> 2                                                         | <i>P</i> 321    |
| <i>a</i> / Å                                                                      | 17.0535(6)                                                         | 9.9786(3)       |
| <i>b</i> / Å                                                                      | 10.0663(4)                                                         | 9.9786(3)       |
| <i>c</i> / Å                                                                      | 6.9926(2)                                                          | 7.0265(3)       |
| $\alpha$ / °                                                                      | 90                                                                 | 90              |
| $\beta$ / °                                                                       | 91.543(3)                                                          | 90              |
| $\gamma$ / °                                                                      | 90                                                                 | 120             |
| Volume / Å <sup>3</sup>                                                           | 1199.95(7)                                                         | 605.91(4)       |
| <i>Z</i>                                                                          | 2                                                                  | 1               |
| $\rho_{\text{calc}}/\text{cm}^3$                                                  | 1.650                                                              | 1.530           |
| $\mu$ / mm <sup>-1</sup>                                                          | 0.800                                                              | 0.780           |
| <i>F</i> (000)                                                                    | 620.0                                                              | 276.0           |
| Radiation                                                                         | Mo K $\alpha$ ( $\lambda=0.71073$ )                                |                 |
| 2 $\theta$ range                                                                  | 4.7–61.764                                                         | 4.714–62.03     |
| Reflns collected                                                                  | 7378                                                               | 9310            |
| Independent reflns (Rint)                                                         | 3795 (0.043)                                                       | 1285 (0.0564)   |
| No. of parameters                                                                 | 174                                                                | 59              |
| GOF                                                                               | 1.073                                                              | 2.313           |
| $R_1$ <sup>[a]</sup> , $wR_2$ <sup>[b]</sup> [ <i>I</i> >2 $\sigma$ ( <i>I</i> )] | 0.0972, 0.2772                                                     | 0.1063, 0.2911  |
| $R_1$ , $wR_2$ [all data]                                                         | 0.1029, 0.2864                                                     | 0.1146, 0.2937  |
| $\Delta\rho$ [c] / e·Å <sup>-3</sup>                                              | 1.63, -0.76                                                        | 1.04, -0.63     |
| Flack parameter                                                                   | 0.72 (6)                                                           | 0.44 (11)       |

<sup>[a]</sup>  $R_1 = \Sigma ||F_o| - |F_c|| / \Sigma |F_o|$ ; <sup>[b]</sup>  $wR_2 = [\Sigma w(F_o^2 - F_c^2)^2] / \Sigma w(F_o^2)^2$ <sup>1/2</sup>; <sup>[c]</sup> maximum and minimum residual electron density.

**Table S2** Selected bond lengths [Å] for **1** at 297 K and 350 K.

| <b>297 K</b>        |           | <b>350 K</b>        |          |
|---------------------|-----------|---------------------|----------|
| Co1–N2 <sup>1</sup> | 1.965(6)  | Co1–N1              | 1.943(6) |
| Co1–N2              | 1.965(6)  | Co1–N1 <sup>1</sup> | 1.943(6) |
| Co1–N4              | 1.964(10) | Co1–N1 <sup>2</sup> | 1.943(6) |
| Co1–N4 <sup>1</sup> | 1.964(10) | Co1–N1 <sup>3</sup> | 1.943(6) |
| Co1–N3              | 1.937(12) | Co1–N1 <sup>4</sup> | 1.943(6) |
| Co1–N3 <sup>1</sup> | 1.938(12) | Co1–N1 <sup>5</sup> | 1.943(6) |
| O7–C5               | 1.431(3)  | O3–N1               | 1.217(8) |
| O6–Li1              | 2.07(3)   | O3–Li1              | 2.042(5) |

|                                                                                                 |           |                                                                                                                                                        |            |
|-------------------------------------------------------------------------------------------------|-----------|--------------------------------------------------------------------------------------------------------------------------------------------------------|------------|
| N2–O1                                                                                           | 1.225(8)  | N1–O1                                                                                                                                                  | 1.273(16)  |
| N2–O2                                                                                           | 1.227(11) | N1–O2                                                                                                                                                  | 1.48(3)    |
| N4–O3                                                                                           | 1.200(12) | O1–O2                                                                                                                                                  | 1.20(3)    |
| N4–O4                                                                                           | 1.221(10) | C2–C1                                                                                                                                                  | 1.554(2)   |
| O1–Li1 <sup>2</sup>                                                                             | 2.064(6)  | C2–O4                                                                                                                                                  | 1.4349(16) |
| Li1–O4                                                                                          | 1.97(2)   | C2–C3                                                                                                                                                  | 1.515(3)   |
| Li1–O4 <sup>3</sup>                                                                             | 1.97(2)   | C1–N2                                                                                                                                                  | 1.509(3)   |
| Symmetry codes: <sup>1</sup> 1–X, +Y, 1–Z; <sup>2</sup> +X, +Y, –1+Z; <sup>3</sup> 1–X, +Y, 2–Z |           | Symmetry codes: <sup>1</sup> +Y–X, –X, +Z; <sup>2</sup> –X, –X+Y, 1–Z; <sup>3</sup> –Y, +X–Y, +Z; <sup>4</sup> +Y, +X, 1–Z; <sup>5</sup> –Y+X, –Y, 1–Z |            |

**Table S3** Selected bond angles [°] for **1** at 297 K.

| <b>1</b> _297 K                      |           |                                      |           |
|--------------------------------------|-----------|--------------------------------------|-----------|
| N2–Co1–N2 <sup>1</sup>               | 176.7(11) | O6 <sup>3</sup> –Li1–O6              | 89.5(15)  |
| N4 <sup>1</sup> –Co1–N2              | 91.2(6)   | O1 <sup>4</sup> –Li1–O6 <sup>3</sup> | 87.5(8)   |
| N4–Co1–N2                            | 86.4(5)   | O1 <sup>1</sup> –Li1–O6              | 87.5(8)   |
| N4 <sup>1</sup> –Co1–N2 <sup>1</sup> | 86.3(5)   | O1 <sup>4</sup> –Li1–O6              | 89.4(8)   |
| N4–Co1–N2 <sup>1</sup>               | 91.2(6)   | O1 <sup>1</sup> –Li1–O6 <sup>3</sup> | 89.4(8)   |
| N4 <sup>1</sup> –Co1–N4              | 86.3(7)   | O1 <sup>1</sup> –Li1–O1 <sup>4</sup> | 176(2)    |
| N3–Co1–N2                            | 87.0(6)   | O4–Li1–O6 <sup>3</sup>               | 178.2(11) |
| N3–Co1–N2 <sup>1</sup>               | 95.4(6)   | O4 <sup>3</sup> –Li1–O6 <sup>3</sup> | 89.1(3)   |
| N3 <sup>1</sup> –Co1–N2 <sup>1</sup> | 87.0(6)   | O4–Li1–O6                            | 89.1(3)   |
| N3 <sup>1</sup> –Co1–N2              | 95.4(6)   | O4 <sup>3</sup> –Li1–O6              | 178.2(11) |
| N3 <sup>1</sup> –Co1–N4 <sup>1</sup> | 92.6(4)   | O4–Li1–O1 <sup>1</sup>               | 89.4(8)   |
| N3–Co1–N4 <sup>1</sup>               | 178.0(8)  | O4–Li1–O1 <sup>4</sup>               | 93.7(7)   |
| N3 <sup>1</sup> –Co1–N4              | 178.0(8)  | O4 <sup>3</sup> –Li1–O1 <sup>4</sup> | 89.4(8)   |
| N3–Co1–N4                            | 92.6(4)   | O4 <sup>3</sup> –Li1–O1 <sup>1</sup> | 93.7(7)   |
| N3–Co1–N3 <sup>1</sup>               | 88.4(9)   | O4 <sup>3</sup> –Li1–O4              | 92.4(15)  |
| C6–C4–C1                             | 110.3(13) | N4–O4–Li1                            | 127.2(10) |
| N1–C1–C4                             | 108.3(13) | C1–N1–C3                             | 105.4(13) |
| N3–O6–Li1                            | 125.6(12) | C2–N1–C1                             | 113.4(13) |
| O1–N2–Co1                            | 123.3(5)  | C2–N1–C3                             | 97.5(12)  |
| O1–N2–O2                             | 116.1(8)  | C5–C6–C4                             | 110.7(13) |
| O2–N2–Co1                            | 118.1(6)  | C7–C6–C4                             | 97.7(14)  |
| O3–N4–Co1                            | 115.8(8)  | C7–C6–C5                             | 116.4(13) |
| O3–N4–O4                             | 119.7(11) | N1–C2–C7                             | 113.8(13) |
| O4–N4–Co1                            | 123.5(9)  | O7–C5–C6                             | 104.0(10) |
| O6–N3–Co1                            | 122.7(10) | O7–C5–C3                             | 113.2(14) |
| O5–N3–Co1                            | 121.4(10) | C6–C5–C3                             | 105.0(12) |

|                                                                                                                           |           |          |           |
|---------------------------------------------------------------------------------------------------------------------------|-----------|----------|-----------|
| O5–N3–O6                                                                                                                  | 115.0(13) | N1–C3–C5 | 114.9(13) |
| N2–O1–Li <sup>2</sup>                                                                                                     | 125.0(5)  | C6–C7–C2 | 108.5(14) |
| Symmetry codes: <sup>1</sup> 1–X, +Y, 1–Z; <sup>2</sup> +X, +Y, –1+Z; <sup>3</sup> 1–X, +Y, 2–Z; <sup>4</sup> +X, +Y, 1+Z |           |          |           |

**Table S4** Selected bond angles [°] for **1** and 350 K.

| <b>1_350 K</b>                                                                                                                                                                                                                           |           |                                      |            |
|------------------------------------------------------------------------------------------------------------------------------------------------------------------------------------------------------------------------------------------|-----------|--------------------------------------|------------|
| N1–Co1–N1 <sup>1</sup>                                                                                                                                                                                                                   | 174.0(12) | O2–O1–N1                             | 73.4(19)   |
| N1 <sup>2</sup> –Co1–N1 <sup>3</sup>                                                                                                                                                                                                     | 92.7(10)  | O3 <sup>5</sup> –Li1–O3              | 87.60(19)  |
| N1–Co1–N1 <sup>3</sup>                                                                                                                                                                                                                   | 84.1(9)   | O3 <sup>5</sup> –Li1–O3 <sup>6</sup> | 88.4(6)    |
| N1 <sup>4</sup> –Co1–N1 <sup>3</sup>                                                                                                                                                                                                     | 91.8(2)   | O3 <sup>2</sup> –Li1–O3              | 87.60(19)  |
| N1 <sup>4</sup> –Co1–N1 <sup>2</sup>                                                                                                                                                                                                     | 174.0(12) | O3 <sup>2</sup> –Li1–O3 <sup>6</sup> | 96.7(6)    |
| N1 <sup>2</sup> –Co1–N1 <sup>5</sup>                                                                                                                                                                                                     | 91.8(2)   | O3 <sup>5</sup> –Li1–O3 <sup>7</sup> | 174.0(8)   |
| N1–Co1–N1 <sup>2</sup>                                                                                                                                                                                                                   | 91.8(2)   | O3 <sup>6</sup> –Li1–O3              | 174.0(8)   |
| N1–Co1–N1 <sup>4</sup>                                                                                                                                                                                                                   | 92.7(10)  | O3 <sup>8</sup> –Li1–O3 <sup>2</sup> | 174.0(8)   |
| N1 <sup>1</sup> –Co1–N1 <sup>2</sup>                                                                                                                                                                                                     | 84.1(9)   | O3 <sup>8</sup> –Li1–O3 <sup>6</sup> | 87.60(19)  |
| N1 <sup>1</sup> –Co1–N1 <sup>5</sup>                                                                                                                                                                                                     | 92.7(10)  | O3 <sup>8</sup> –Li1–O3 <sup>7</sup> | 87.60(19)  |
| N1 <sup>3</sup> –Co1–N1 <sup>5</sup>                                                                                                                                                                                                     | 174.0(12) | O3 <sup>6</sup> –Li1–O3 <sup>7</sup> | 87.59(19)  |
| N1 <sup>1</sup> –Co1–N1 <sup>4</sup>                                                                                                                                                                                                     | 91.8(2)   | O3 <sup>8</sup> –Li1–O3 <sup>5</sup> | 96.7(6)    |
| N1–Co1–N1 <sup>5</sup>                                                                                                                                                                                                                   | 91.8(2)   | O3 <sup>8</sup> –Li1–O3              | 88.4(6)    |
| N1 <sup>1</sup> –Co1–N1 <sup>3</sup>                                                                                                                                                                                                     | 91.8(2)   | O3–Li1–O3 <sup>7</sup>               | 96.7(6)    |
| N1 <sup>4</sup> –Co1–N1 <sup>5</sup>                                                                                                                                                                                                     | 84.1(9)   | O3 <sup>2</sup> –Li1–O3 <sup>5</sup> | 87.60(19)  |
| N1–O3–Li1                                                                                                                                                                                                                                | 124.7(6)  | O3 <sup>2</sup> –Li1–O3 <sup>7</sup> | 88.4(6)    |
| O3–N1–Co1                                                                                                                                                                                                                                | 123.8(6)  | O4–C2–C1                             | 104.53(19) |
| O3–N1–O1                                                                                                                                                                                                                                 | 119.2(10) | O4–C2–C3                             | 110.2(2)   |
| O3–N1–O2                                                                                                                                                                                                                                 | 101.3(14) | C3–C2–C1                             | 103.27(19) |
| O1–N1–Co1                                                                                                                                                                                                                                | 117.0(9)  | N2–C1–C2                             | 96.05(16)  |
| O1–N1–O2                                                                                                                                                                                                                                 | 51.1(11)  | O1–O2–N1                             | 55.5(14)   |
| O2–N1–Co1                                                                                                                                                                                                                                | 113.7(13) |                                      |            |
| Symmetry codes: <sup>1</sup> –Y+X, –Y, 1–Z; <sup>2</sup> +Y–X, –X, +Z; <sup>3</sup> +Y, +X, 1–Z; <sup>4</sup> –X, –X+Y, 1–Z; <sup>5</sup> –Y, +X–Y, +Z; <sup>6</sup> –Y+X, –Y, 2–Z; <sup>7</sup> +Y, +X, 2–Z; <sup>8</sup> –X, –X+Y, 2–Z |           |                                      |            |

**Table S5** Bond lengths [Å] and bond angles [°] of the hydrogen bond at 297 K of **1**.

| <b>D</b> | <b>H</b> | <b>A</b>        | <b>d(D–H)/Å</b> | <b>d(H–A)/Å</b> | <b>d(D–A)/Å</b> | <b>D–H–A/°</b> |
|----------|----------|-----------------|-----------------|-----------------|-----------------|----------------|
| O7       | H7       | O4 <sup>1</sup> | 0.82            | 2.41            | 2.737(13)       | 104.6          |
| C1       | H1B      | O7              | 0.97            | 2.52            | 2.91(2)         | 103.8          |
| C2       | H2B      | O5              | 0.97            | 2.69            | 3.048(17)       | 102.1          |
| C3       | H3A      | O1 <sup>2</sup> | 0.97            | 2.69            | 3.497(15)       | 141.1          |

Symmetry codes:  $^1+X$ ,  $-1+Y$ ,  $-1+Z$ ;  $^21/2-X$ ,  $-1/2+Y$ ,  $-Z$ ;  $^31/2-X$ ,  $1/2+Y$ ,  $-Z$

---

### Calculations of $\Delta S$ and N

$$\Delta S = \int_{T_1}^{T_2} \frac{QdT}{T} \approx \frac{\Delta T}{T_C} = \frac{\frac{30.66 + 28.77}{2} \times 596.30}{342} = 51.81 \text{ J} \cdot \text{mol}^{-1} \cdot \text{K}^{-1}$$

$$\Delta S = R \ln N$$

$$N = e^{\frac{\Delta S}{R}} = e^{\frac{51.81}{8.314}} = 521.55$$
